# Supplementary material for: Molecular Docking and Biophysical Studies for Antiproliferative Assessment of Synthetic Pyrazolo-Pyrimidinones Tethered with Hydrazide-Hydrazones
Source: PubMed Central journal article supplement (PMC7962976; doi:10.3390/ijms22052742), 2021-03-08
Supplement: ijms-22-02742-s001.pdf [file ijms-22-02742-s001.pdf]

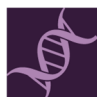

## Supplementary material

### Molecular docking and biophysical studies for antiproliferative assessment of synthetic pyrazolo-pyrimidinones tethered with hydrazide-hydrazones

#### Table of Contents

|                                                                                                             |       |
|-------------------------------------------------------------------------------------------------------------|-------|
| Figure S1. Real time monitoring of NHDF cell viability .....                                                | p. 2  |
| Figure S2. Binding mode of ester <b>3</b> in the erlotinib binding site of EGFR (PDB:1M17) .....            | p. 2  |
| Figure S3. CD spectra of a) KRAS 22RT, b) BCL2-G4, c) Tel 23 and d) Hairpin duplex .....                    | p. 3  |
| Figure S4. <sup>1</sup> H NMR spectrum of compound <b>2</b> (DMSO- <i>d</i> <sub>6</sub> , 400MHz) .....    | p. 4  |
| Figure S5. <sup>13</sup> C NMR spectrum of compound <b>2</b> (DMSO- <i>d</i> <sub>6</sub> , 100MHz).....    | p. 4  |
| Figure S6. <sup>1</sup> H NMR spectrum of compound <b>3</b> (DMSO- <i>d</i> <sub>6</sub> , 400MHz) .....    | p. 5  |
| Figure S7. <sup>13</sup> C NMR spectrum of compound <b>3</b> (DMSO- <i>d</i> <sub>6</sub> , 100MHz).....    | p. 5  |
| Figure S8. <sup>1</sup> H NMR spectrum of compound <b>4</b> (DMSO- <i>d</i> <sub>6</sub> , 400MHz) .....    | p. 6  |
| Figure S9. <sup>13</sup> C NMR spectrum of compound <b>4</b> (DMSO- <i>d</i> <sub>6</sub> , 100MHz).....    | p. 6  |
| Figure S10. <sup>1</sup> H NMR spectrum of compound <b>5a</b> (DMSO- <i>d</i> <sub>6</sub> , 400MHz) .....  | p. 7  |
| Figure S11. <sup>13</sup> C NMR spectrum of compound <b>5a</b> (DMSO- <i>d</i> <sub>6</sub> , 100MHz).....  | p. 7  |
| Figure S12. <sup>1</sup> H NMR spectrum of compound <b>5b</b> (DMSO- <i>d</i> <sub>6</sub> , 400MHz).....   | p. 8  |
| Figure S13. <sup>13</sup> C NMR spectrum of compound <b>5b</b> (DMSO- <i>d</i> <sub>6</sub> , 100MHz).....  | p. 8  |
| Figure S14. <sup>1</sup> H NMR spectrum of compound <b>5c</b> (DMSO- <i>d</i> <sub>6</sub> , 400MHz). ..... | p. 9  |
| Figure S15. <sup>13</sup> C NMR spectrum of compound <b>5c</b> (DMSO- <i>d</i> <sub>6</sub> , 100MHz).....  | p. 9  |
| Figure S16. <sup>1</sup> H NMR spectrum of compound <b>5d</b> (DMSO- <i>d</i> <sub>6</sub> , 400MHz).....   | p. 10 |
| Figure S17. <sup>13</sup> C NMR spectrum of compound <b>5d</b> (DMSO- <i>d</i> <sub>6</sub> , 100MHz).....  | p. 10 |
| Figure S18. <sup>1</sup> H NMR spectrum of compound <b>5e</b> (DMSO- <i>d</i> <sub>6</sub> , 400MHz) .....  | p. 11 |
| Figure S19. <sup>13</sup> C NMR spectrum of compound <b>5e</b> (DMSO- <i>d</i> <sub>6</sub> , 100MHz).....  | p. 11 |
| Figure S20. <sup>1</sup> H NMR spectrum of compound <b>5f</b> (DMSO- <i>d</i> <sub>6</sub> , 400MHz).....   | p. 12 |
| Figure S21. <sup>13</sup> C NMR spectrum of compound <b>5f</b> (DMSO- <i>d</i> <sub>6</sub> , 100MHz).....  | p. 12 |
| Figure S22. <sup>1</sup> H NMR spectrum of compound <b>5g</b> (DMSO- <i>d</i> <sub>6</sub> , 400MHz).....   | p. 13 |
| Figure S23. <sup>13</sup> C NMR spectrum of compound <b>5g</b> (DMSO- <i>d</i> <sub>6</sub> , 100MHz) ..... | p. 13 |
| Figure S24. <sup>1</sup> H NMR spectrum of compound <b>5h</b> (DMSO- <i>d</i> <sub>6</sub> , 400MHz).....   | p. 14 |
| Figure S25. <sup>13</sup> C NMR spectrum of compound <b>5h</b> (DMSO- <i>d</i> <sub>6</sub> , 100MHz).....  | p. 14 |
| Figure S26. HR-ESI-MS spectrum of compound <b>2</b> .....                                                   | p. 15 |
| Figure S27. HR-ESI-MS spectrum of compound <b>3</b> .....                                                   | p. 15 |
| Figure S28. HR-ESI-MS spectrum of compound <b>4</b> .....                                                   | p. 15 |
| Figure S29. HR-ESI-MS spectrum of compound <b>5a</b> .....                                                  | p. 16 |
| Figure S30. HR-ESI-MS spectrum of compound <b>5b</b> .....                                                  | p. 16 |
| Figure S31. HR-ESI-MS spectrum of compound <b>5c</b> .....                                                  | p. 16 |
| Figure S32. HR-ESI-MS spectrum of compound <b>5d</b> .....                                                  | p. 17 |
| Figure S33. HR-ESI-MS spectrum of compound <b>5e</b> .....                                                  | p. 17 |
| Figure S34. HR-ESI-MS spectrum of compound <b>5f</b> .....                                                  | p.17  |
| Figure S35. HR-ESI-MS spectrum of compound <b>5g</b> .....                                                  | p. 18 |
| Figure S36. HR-ESI-MS spectrum of compound <b>5h</b> .....                                                  | p. 18 |

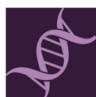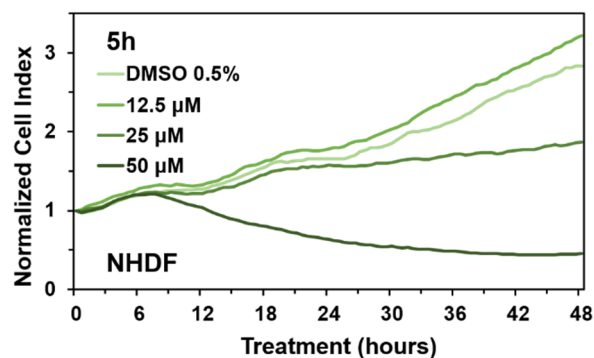

| IC <sub>50</sub> - NHDF |                            |
|-------------------------|----------------------------|
| Compound                | IC <sub>50</sub> (μM) ± SE |
| 5a                      | 60.18 ± 2.908              |
| 5e                      | 66.16 ± 3.367              |
| 5g                      | 26.05 ± 1.110              |
| 5h                      | 32.07 ± 1.703              |
| CDDP                    | 14.86 ± 0.802              |

**Figure S1.** Real time monitoring of NHDF cell viability after 48 h exposure to synthetic compounds **5a**, **5e**, **5g**, and **5h**, using the xCELLigence System Real-Time Cell Analyzer. Left panel, representative NCI traces of NHDF cells exposed to increasing concentrations (12.5, 25, 50 μM) of **5h** and 0.5% DMSO vehicle (control) for 48 hours. Right panel, IC<sub>50</sub> values (± standard error, SE) of cisplatin (CDDP), **5a**, **5e**, **5g**, and **5h** against NHDF cells after 48h drug exposure. The IC<sub>50</sub> value represents the concentration of each compound that reduces the NCI by 50%. Data are means of three independent experiments.

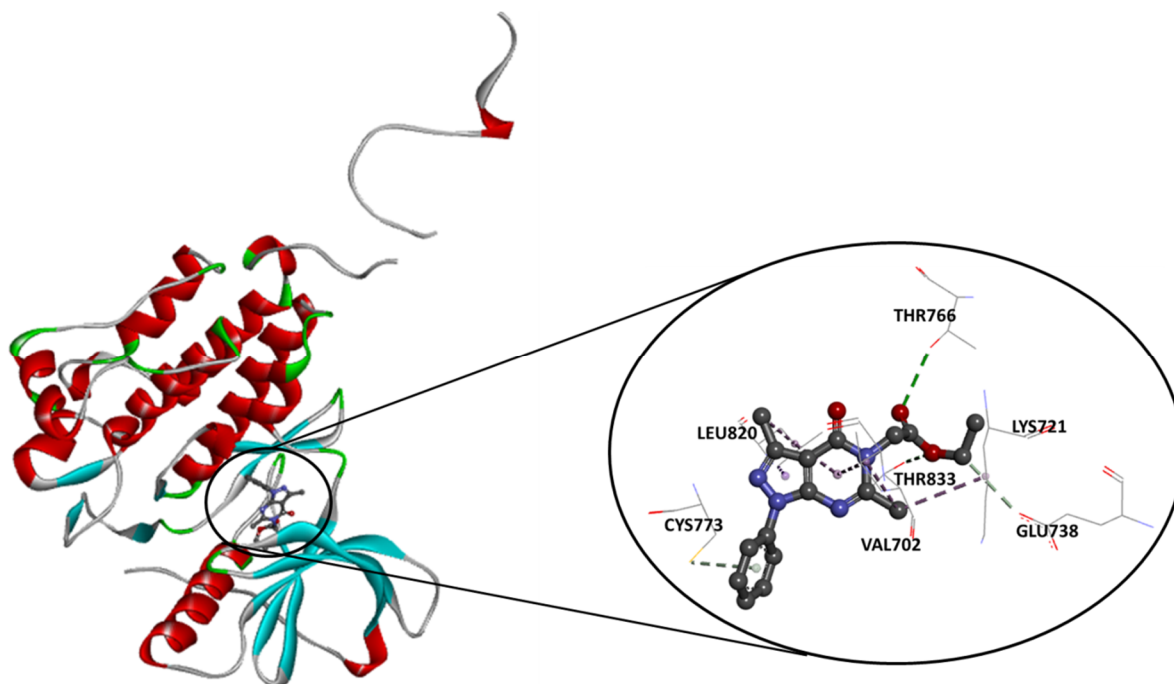

**Figure S2.** Binding mode of ester 3 in the Erlotinib binding site of EGFR (PDB:1M17).

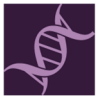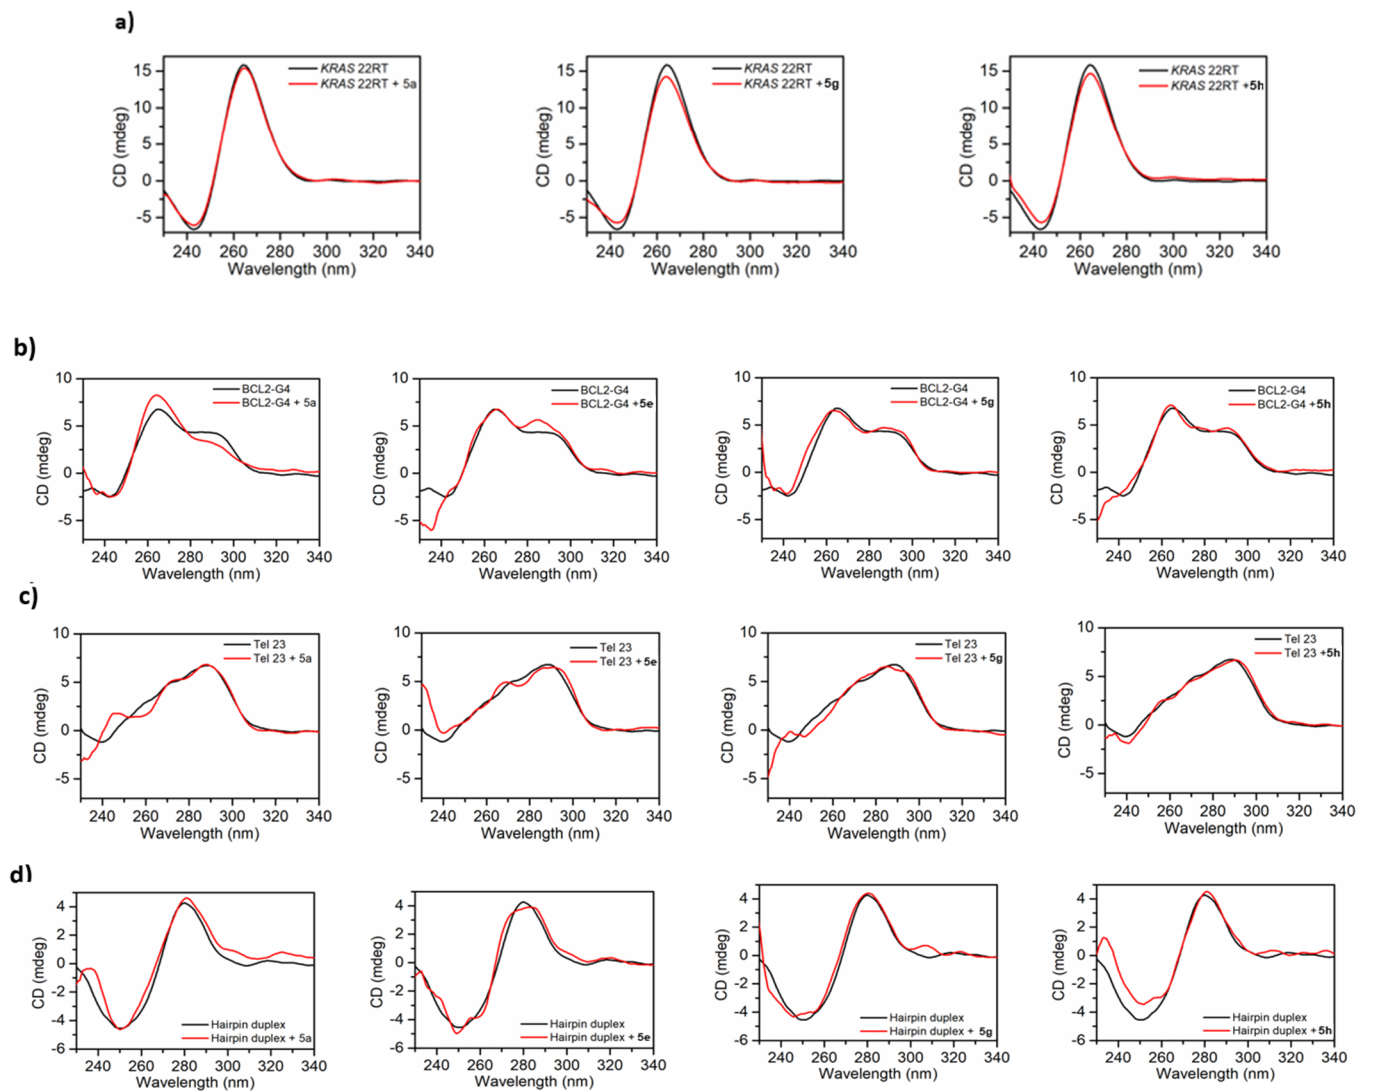

**Figure S3.** CD spectra of **a)** KRAS 22RT, **b)** BCL2-G4, **c)** Tel 23 and **d)** Hairpin duplex in the absence (black line) and in the presence (red line) of **5a**, **5e**, **5g** and **5h**.

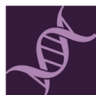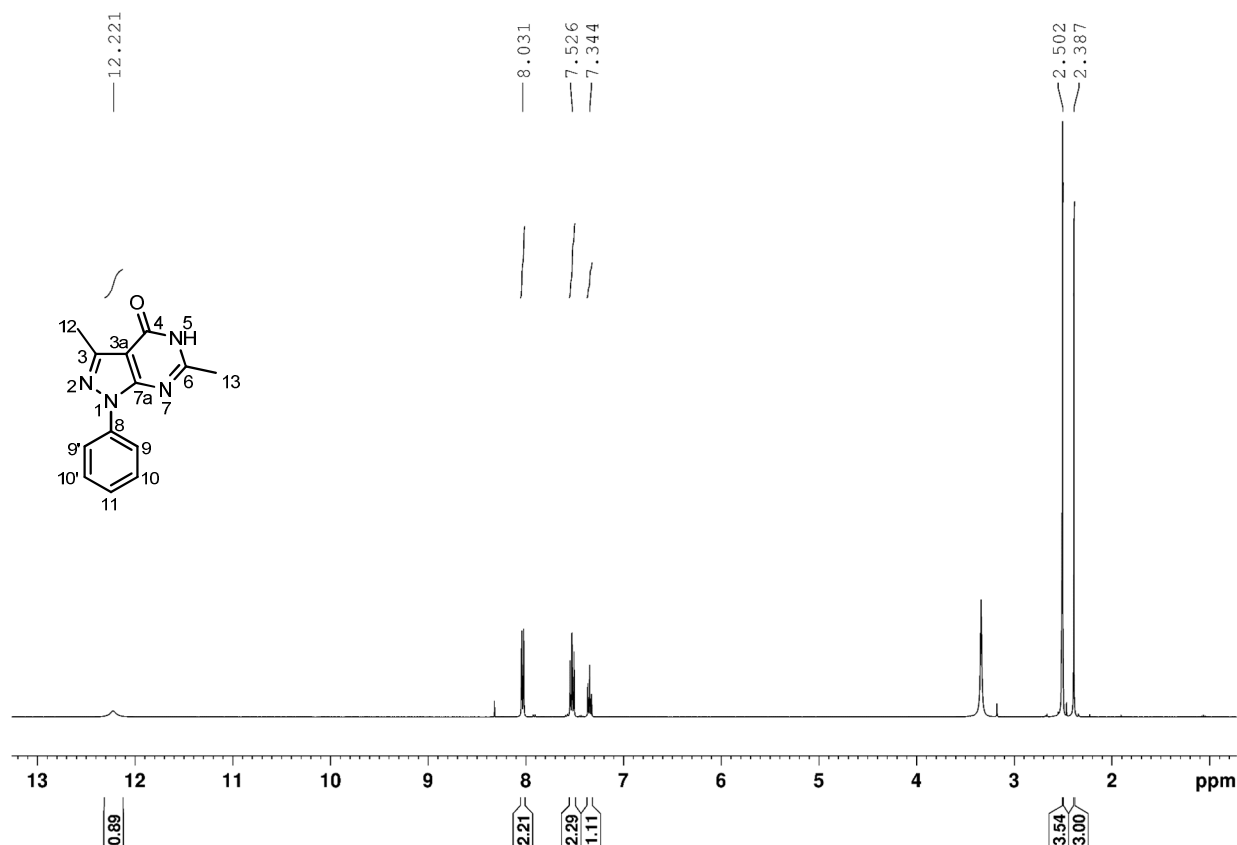

Figure S4.  $^1\text{H NMR}$  spectrum of compound 2 (DMSO- $d_6$ , 400MHz).

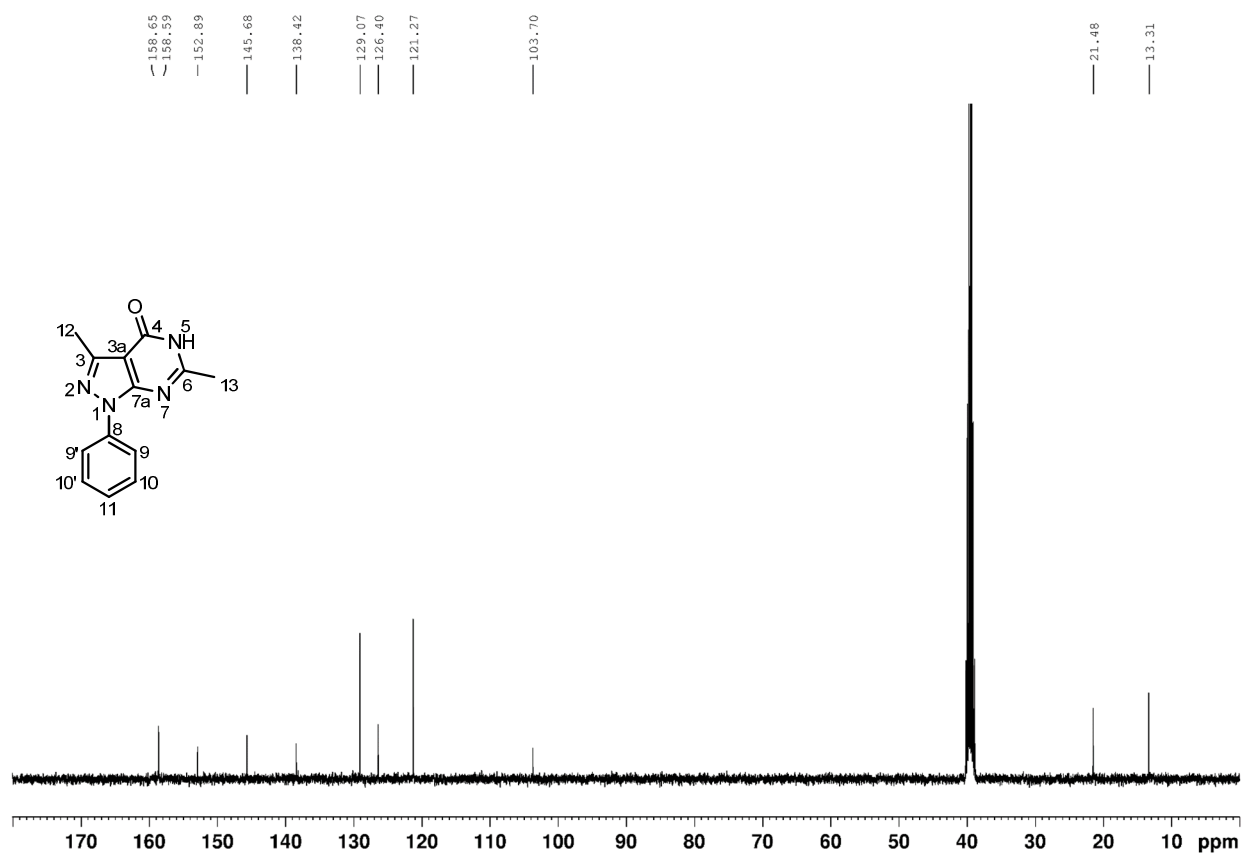

Figure S5.  $^{13}\text{C NMR}$  spectrum of compound 2 (DMSO- $d_6$ , 100MHz).

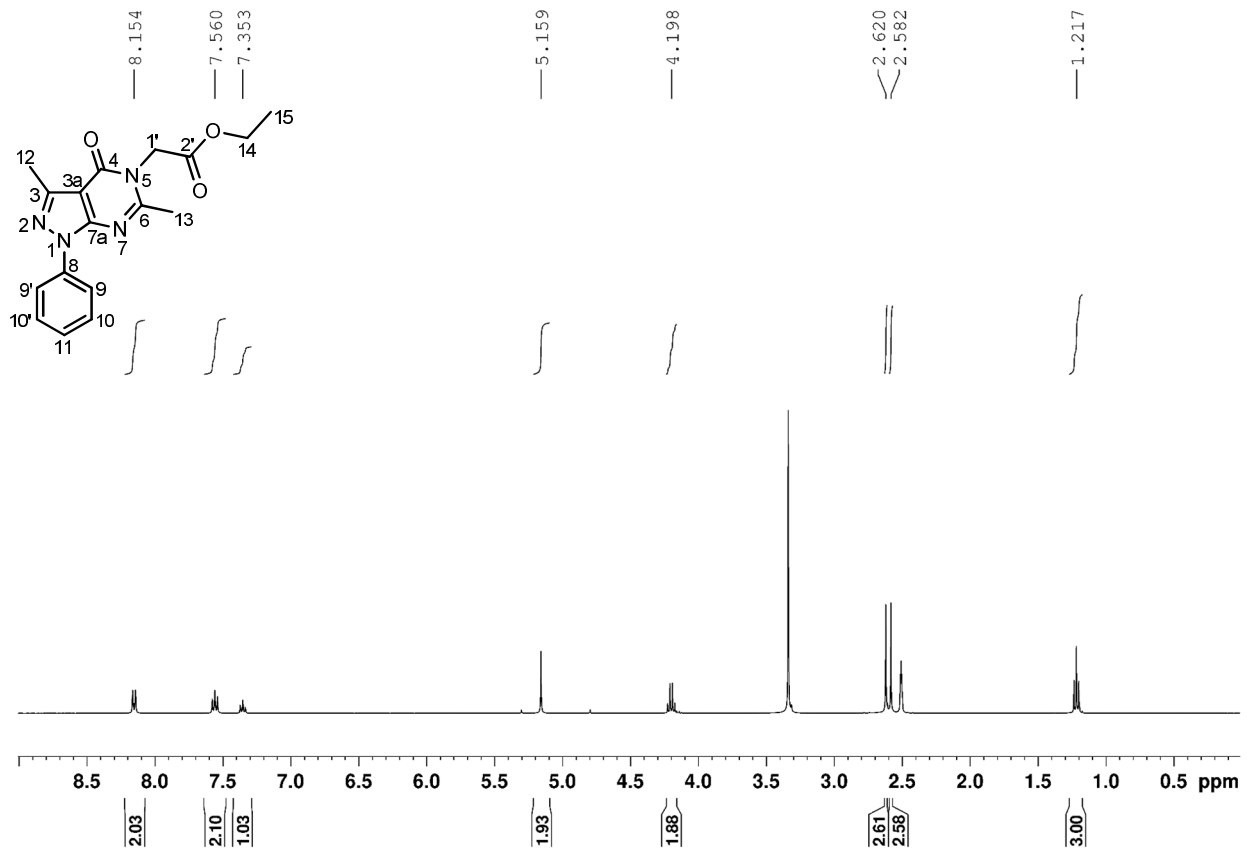

Figure S6.  $^1\text{H}$  NMR spectrum of compound 3 (DMSO- $d_6$ , 400MHz).

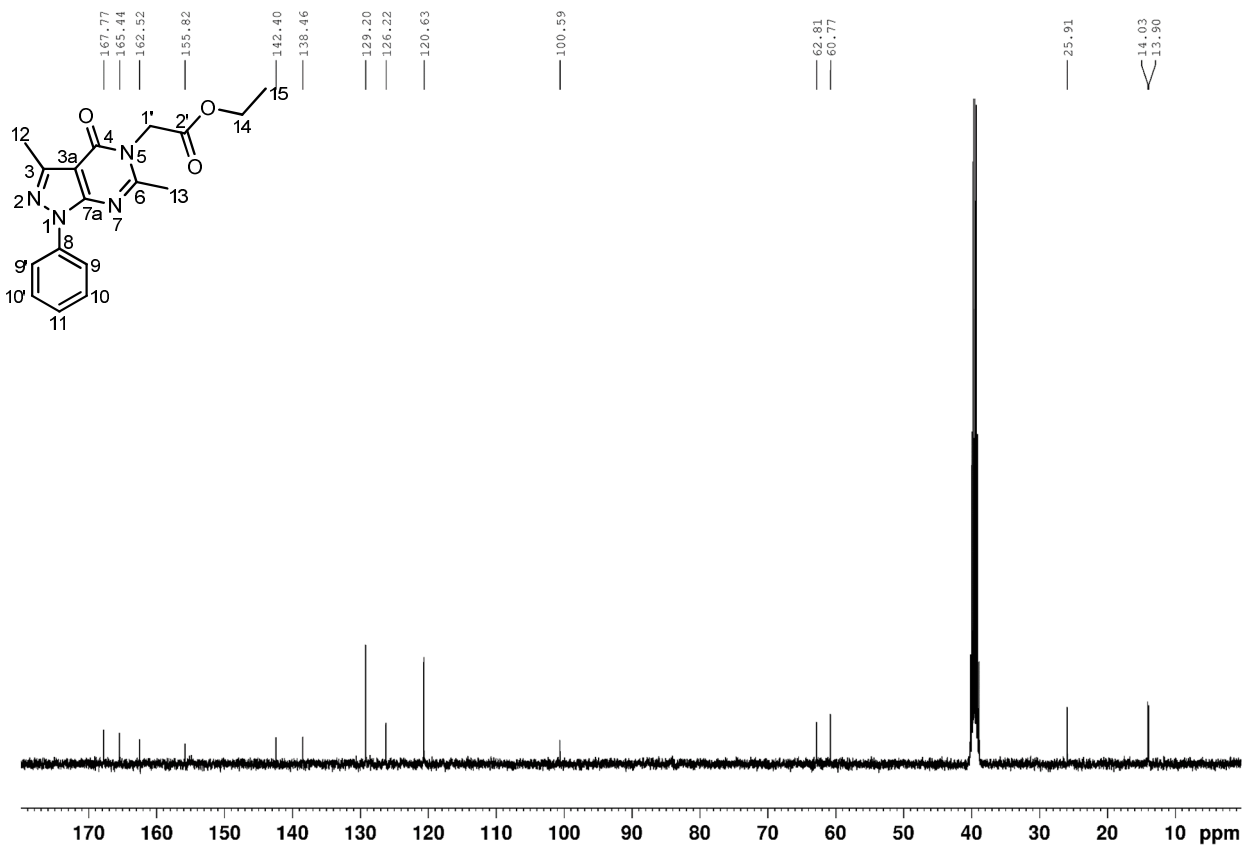

Figure S7.  $^{13}\text{C}$  NMR spectrum of compound 3 (DMSO- $d_6$ , 100MHz).

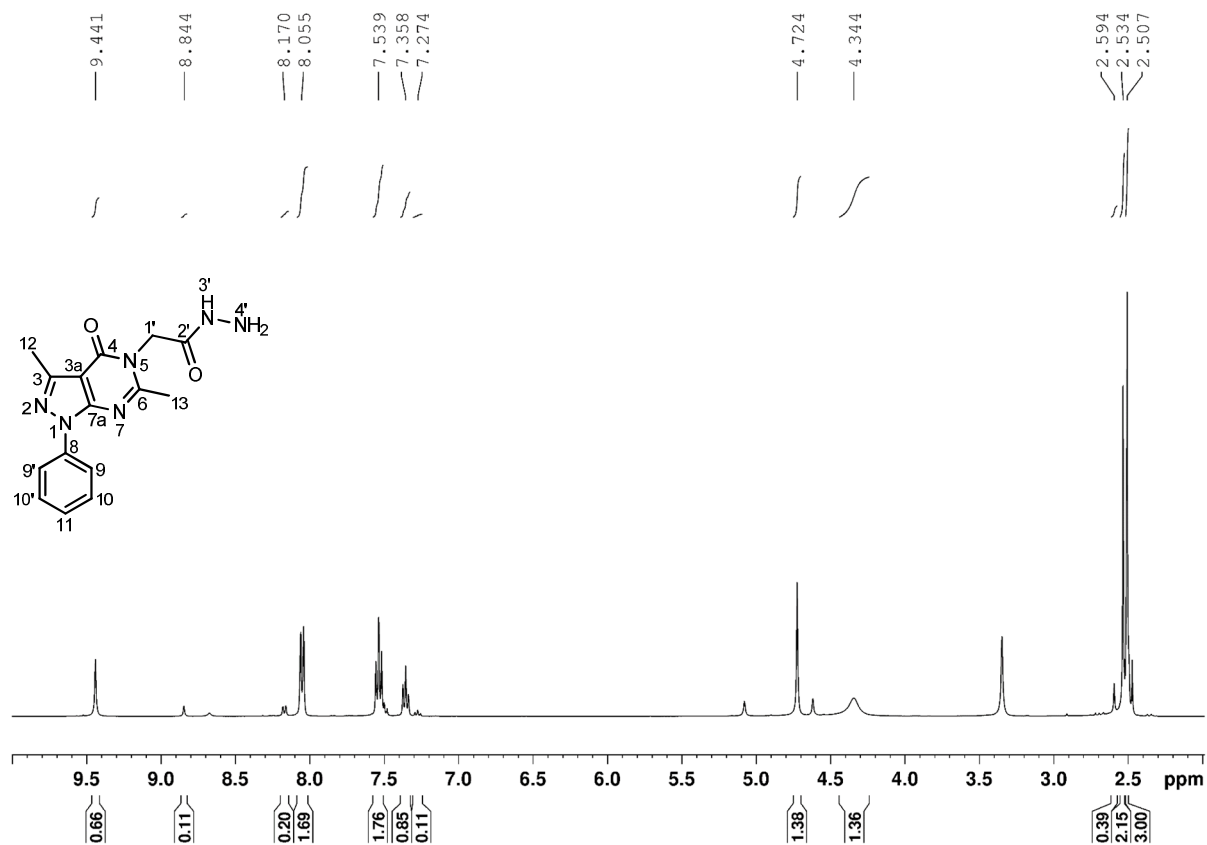

Figure S8.  $^1\text{H}$  NMR spectrum of compound 4 (DMSO- $d_6$ , 400MHz).

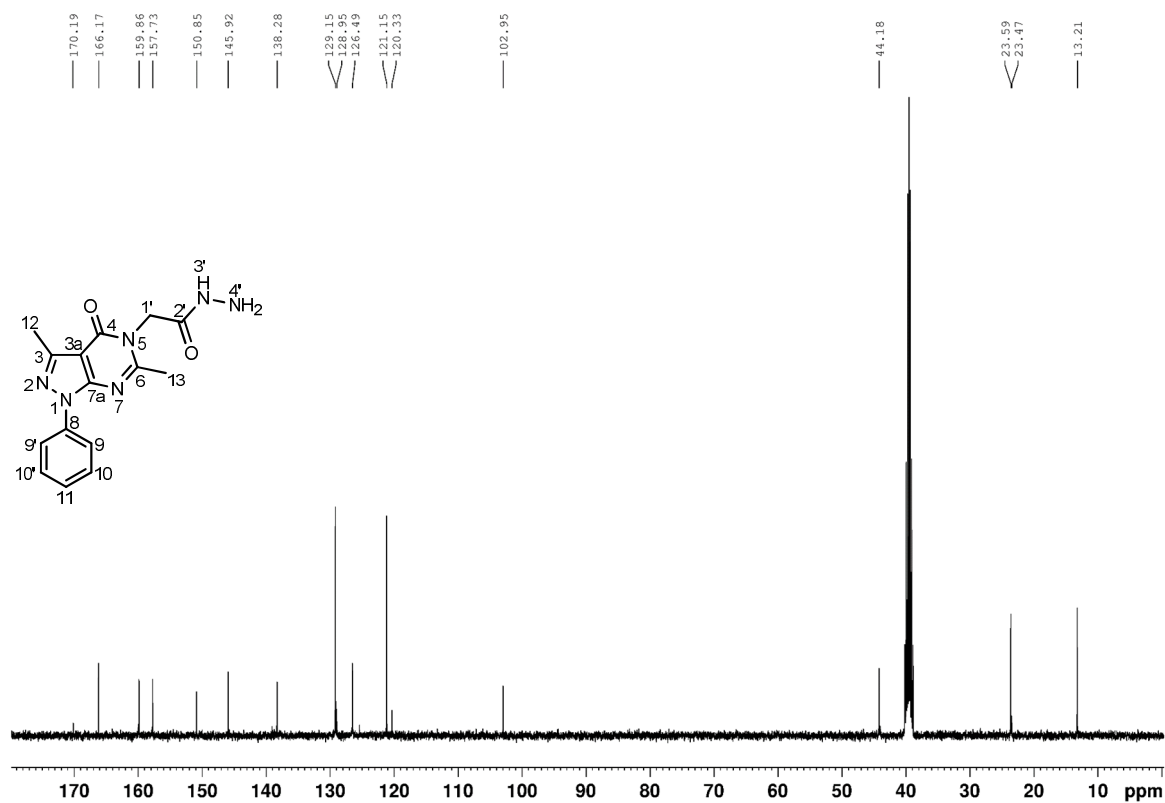

Figure S9.  $^{13}\text{C}$  NMR spectrum of compound 4 (DMSO- $d_6$ , 100MHz).

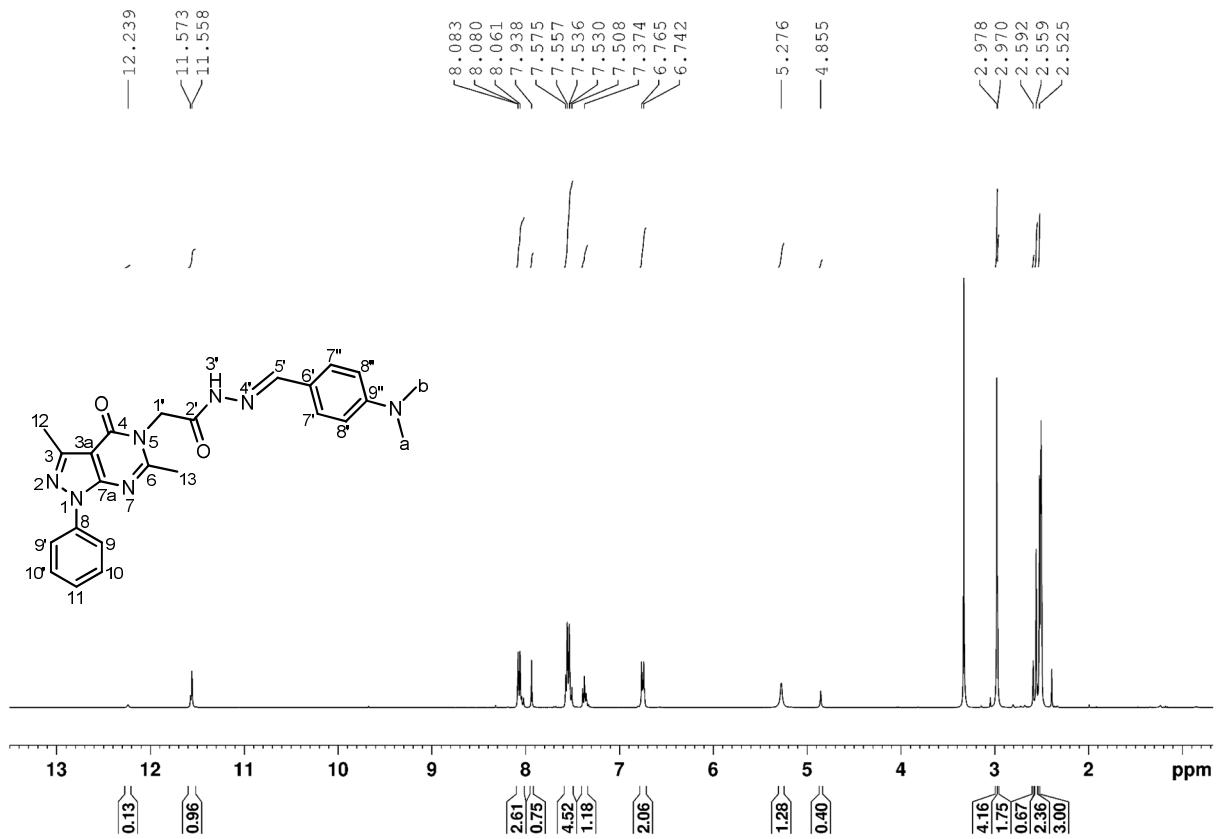

Figure S10. <sup>1</sup>H NMR spectrum of compound 5a (DMSO-*d*<sub>6</sub>, 400MHz).

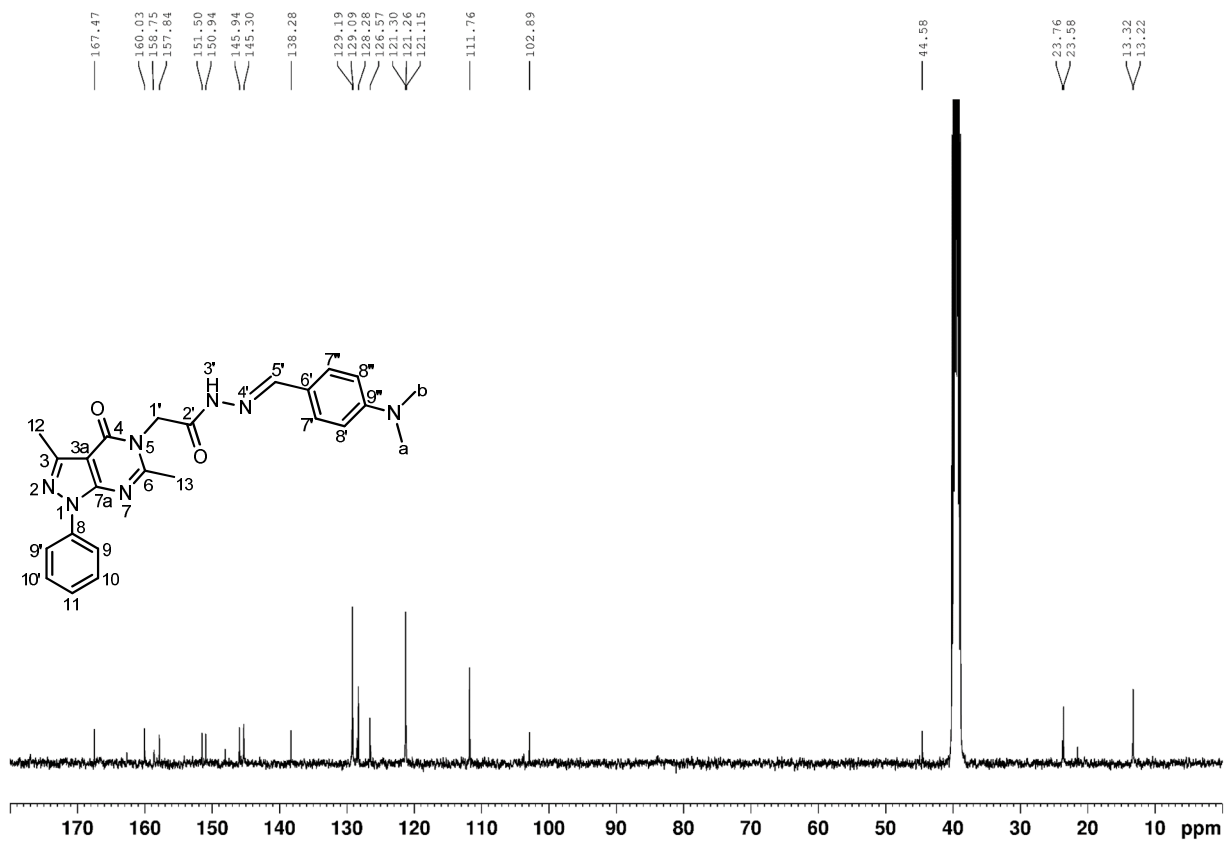

Figure S11. <sup>13</sup>C NMR spectrum of compound 5a (DMSO-*d*<sub>6</sub>, 100MHz).

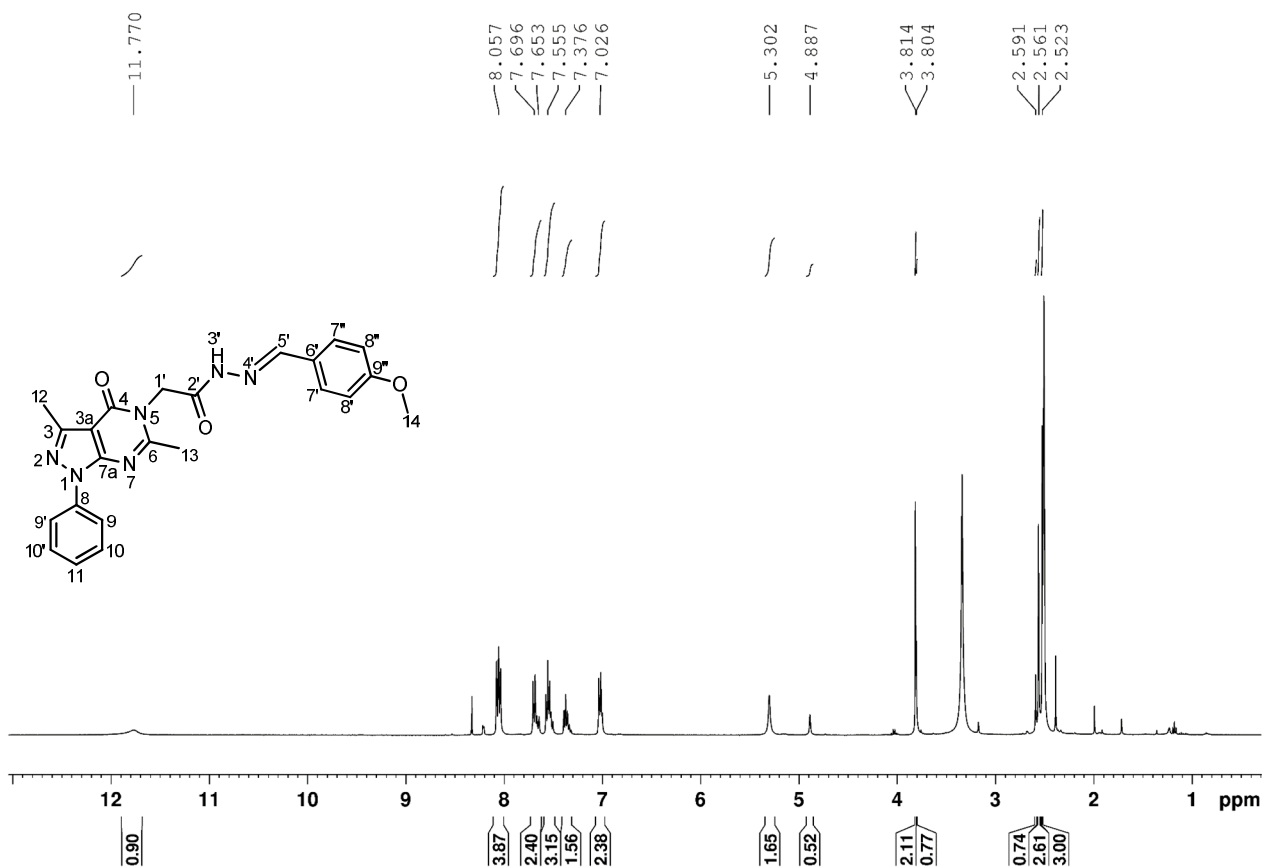

Figure S12. <sup>1</sup>H NMR spectrum of compound 5b (DMSO-*d*<sub>6</sub>, 400MHz).

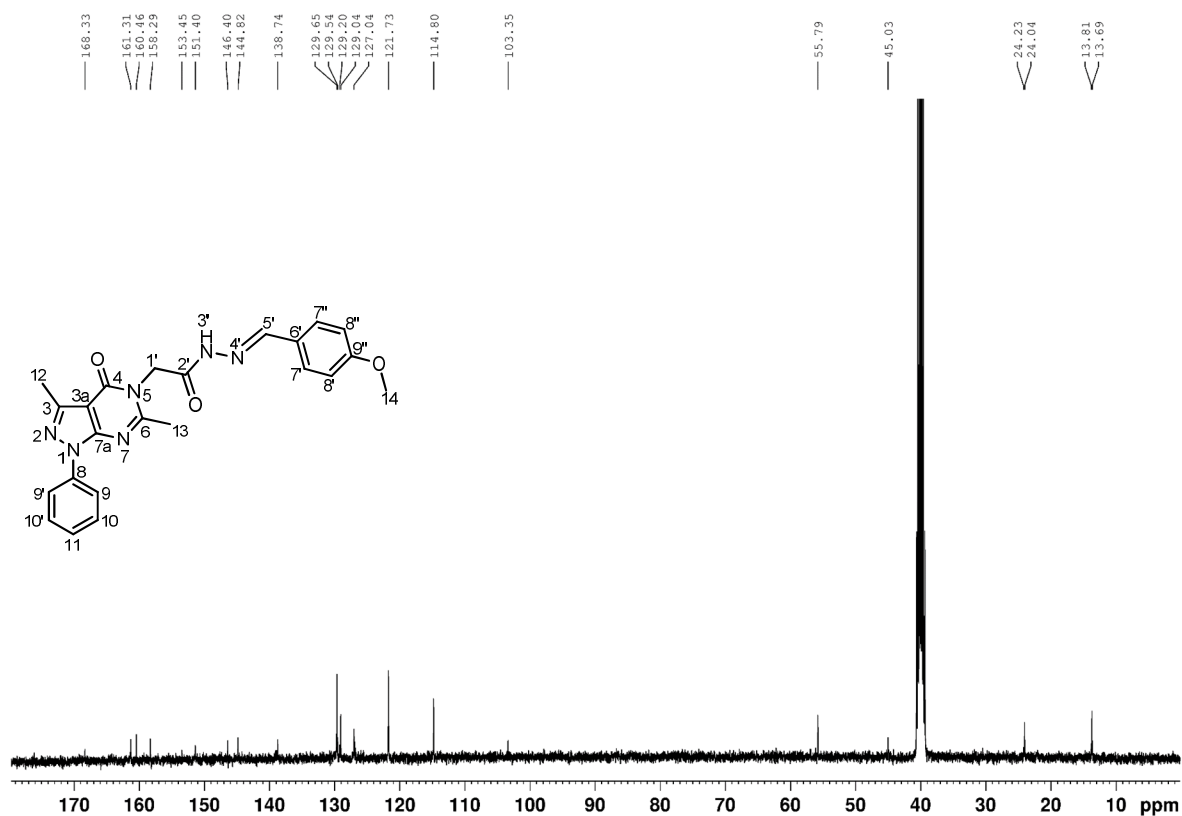

Figure S13. <sup>13</sup>C NMR spectrum of compound 5b (DMSO-*d*<sub>6</sub>, 100MHz).



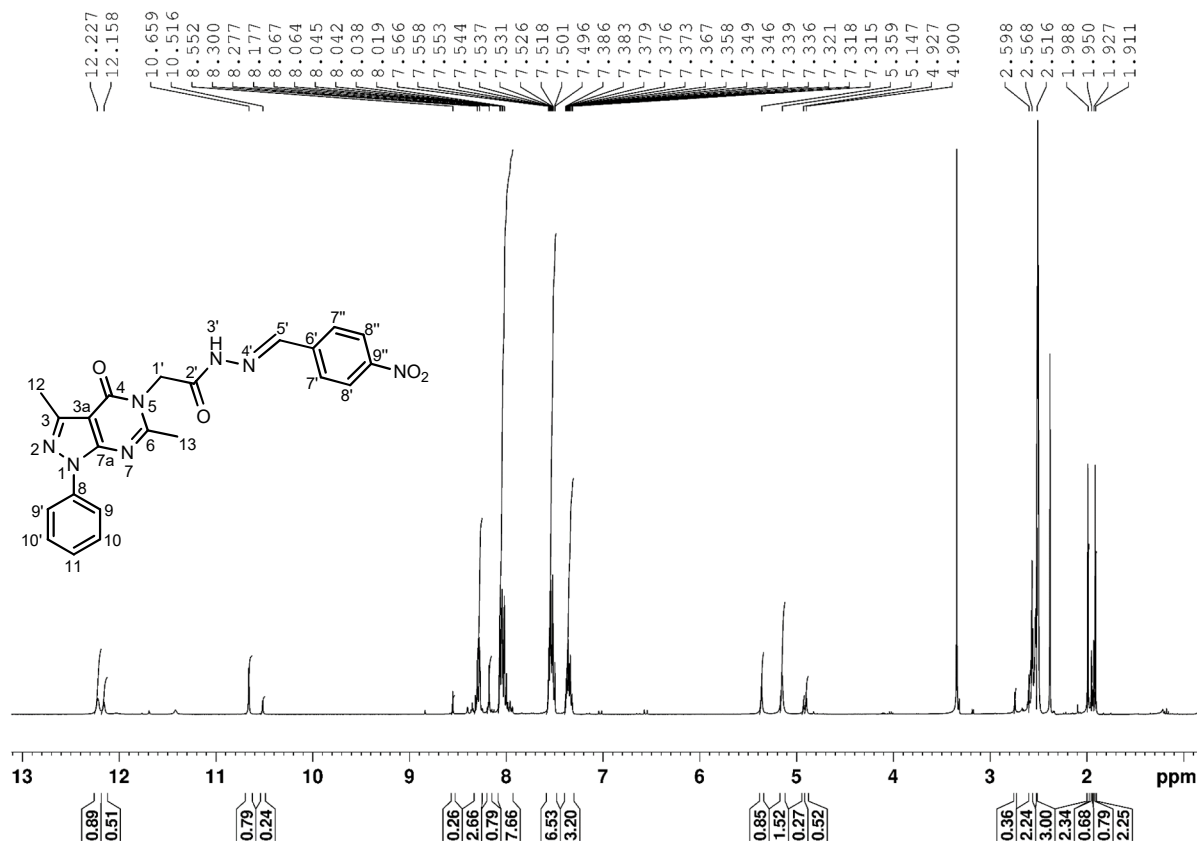

Figure S14. <sup>1</sup>H NMR spectrum of compound 5c (DMSO-*d*<sub>6</sub>, 400MHz).

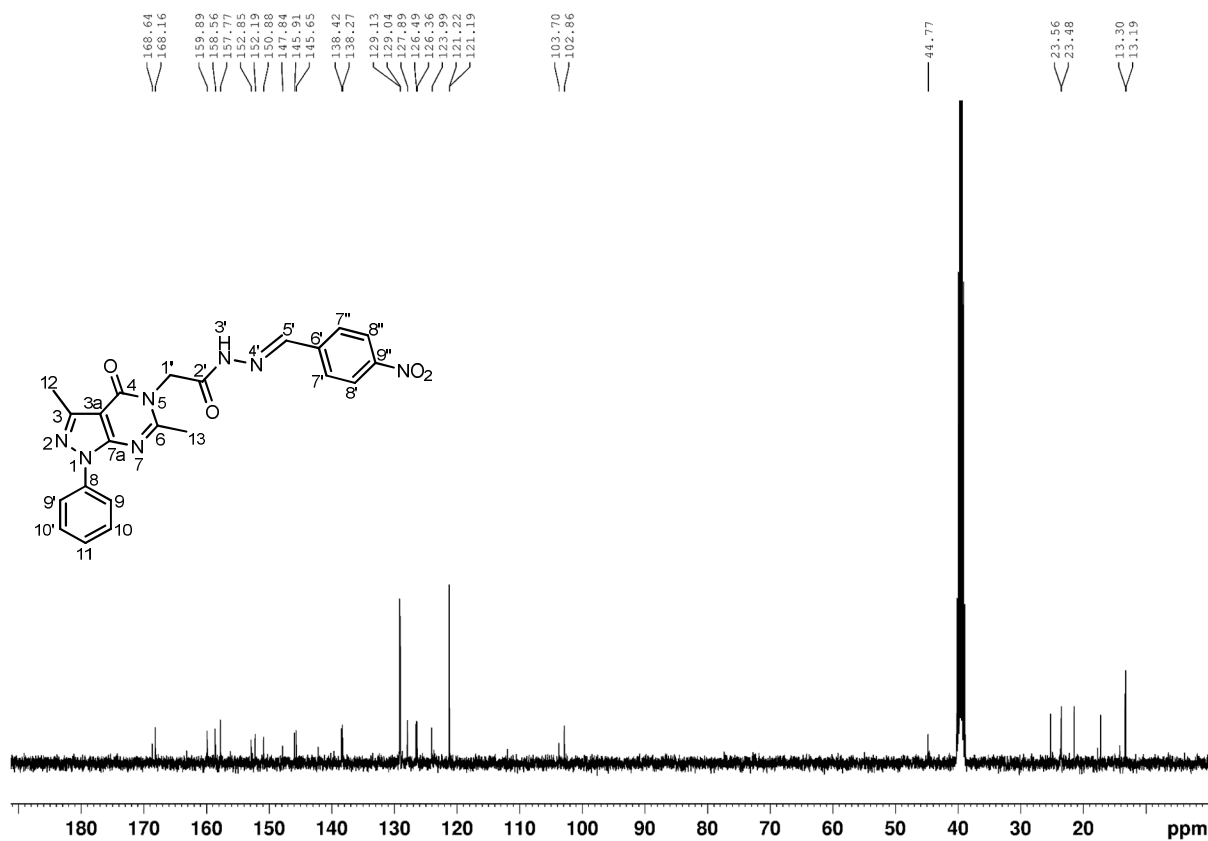

Figure S15. <sup>13</sup>C NMR spectrum of compound 5c (DMSO-*d*<sub>6</sub>, 100MHz).

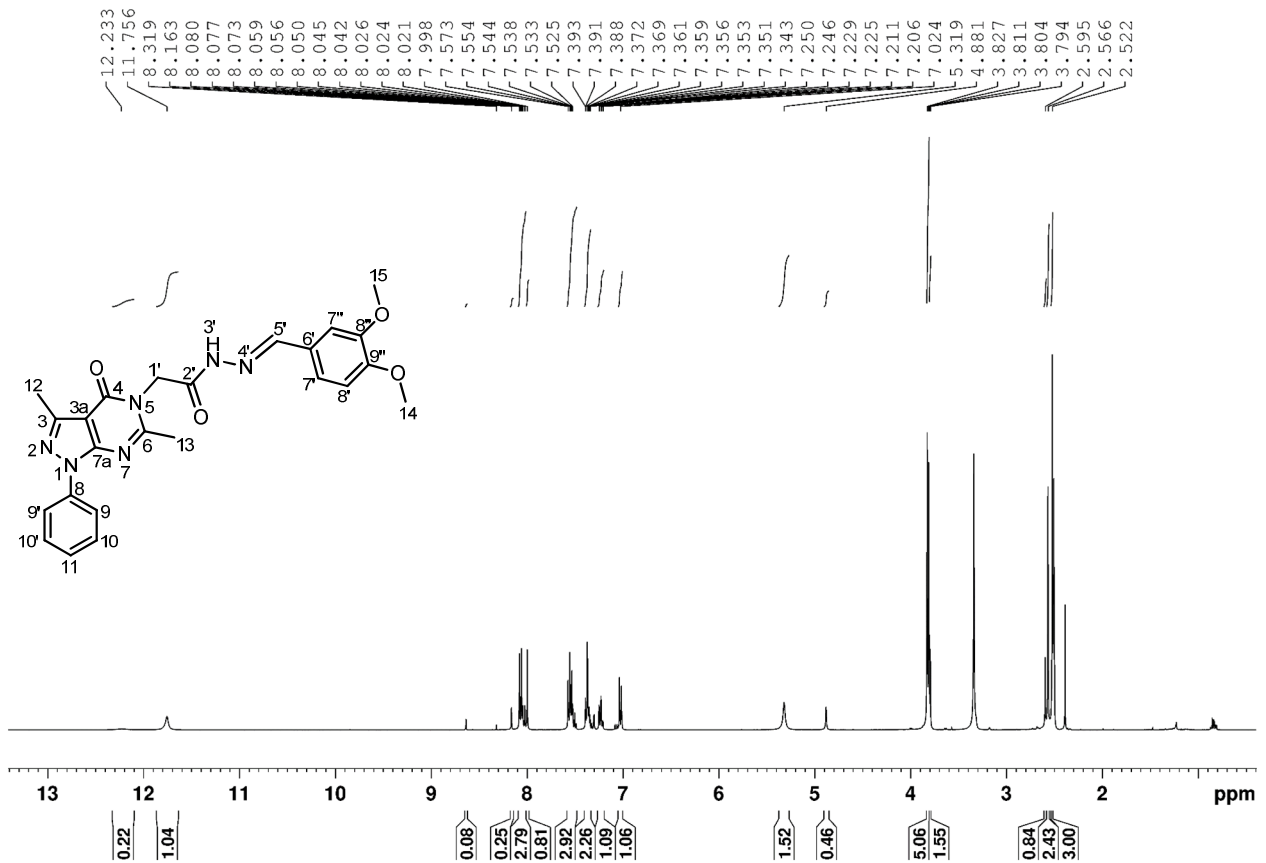

**Figure S16.**  $^1\text{H}$  NMR spectrum of compound **5d** ( $\text{DMSO-}d_6$ , 400MHz).

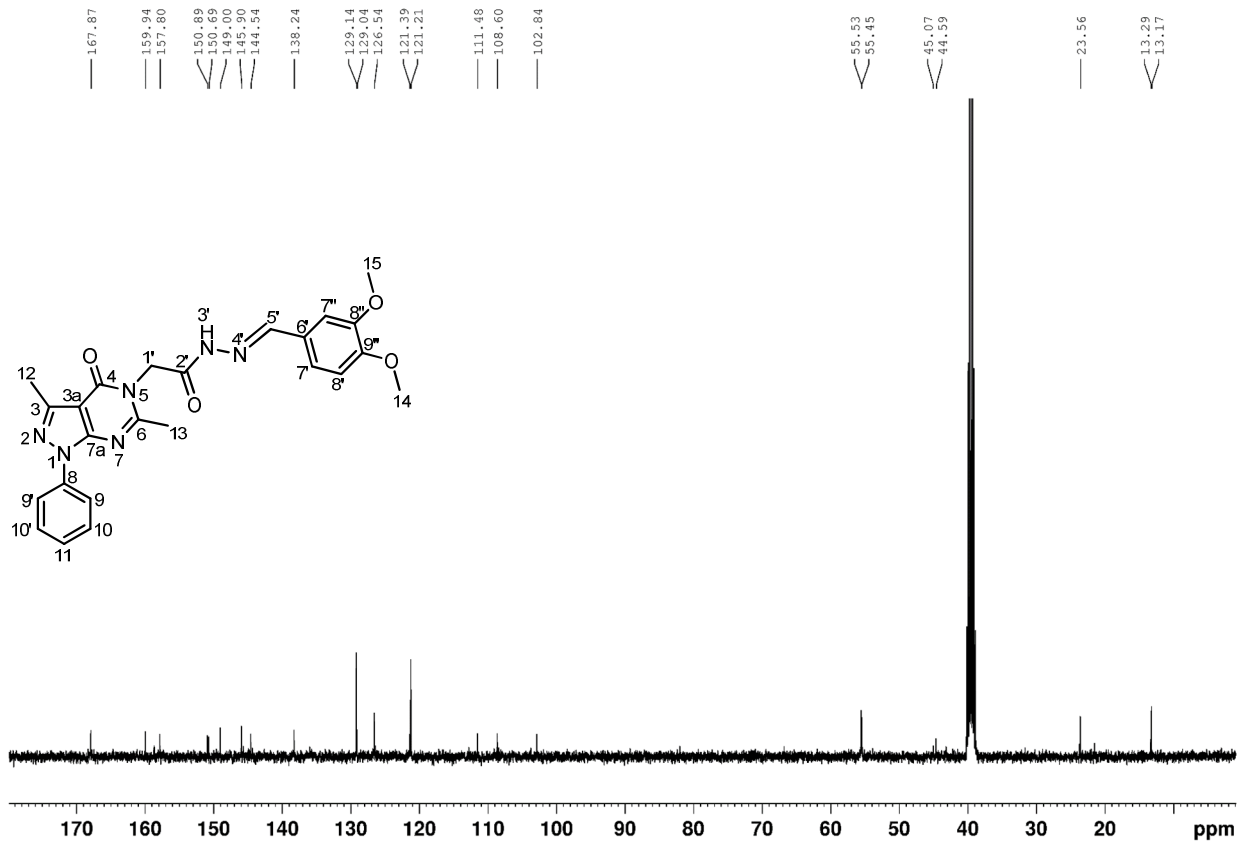

**Figure S17.**  $^{13}\text{C}$  NMR spectrum of compound **5d** ( $\text{DMSO-}d_6$ , 100MHz).

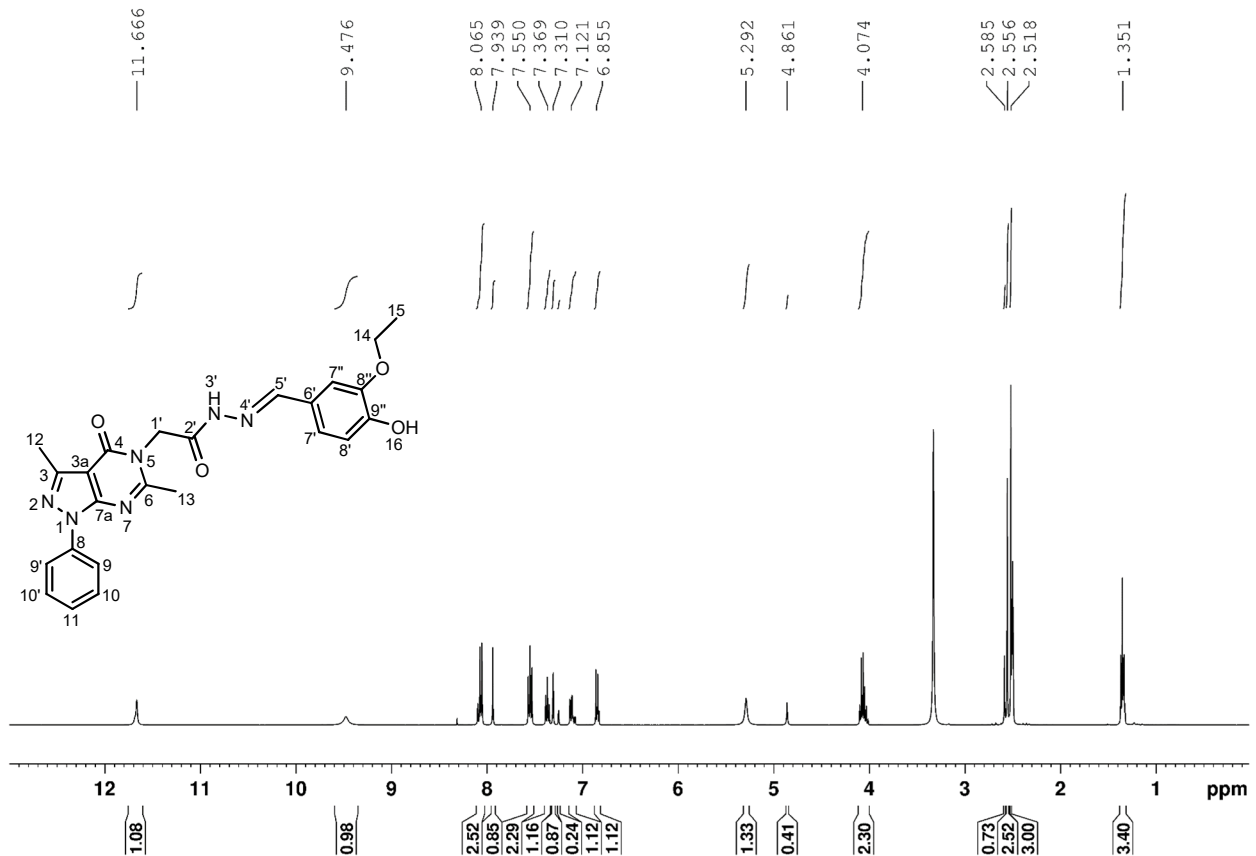

**Figure S18.**  $^1\text{H}$  NMR spectrum of compound 5e (DMSO- $d_6$ , 400MHz).

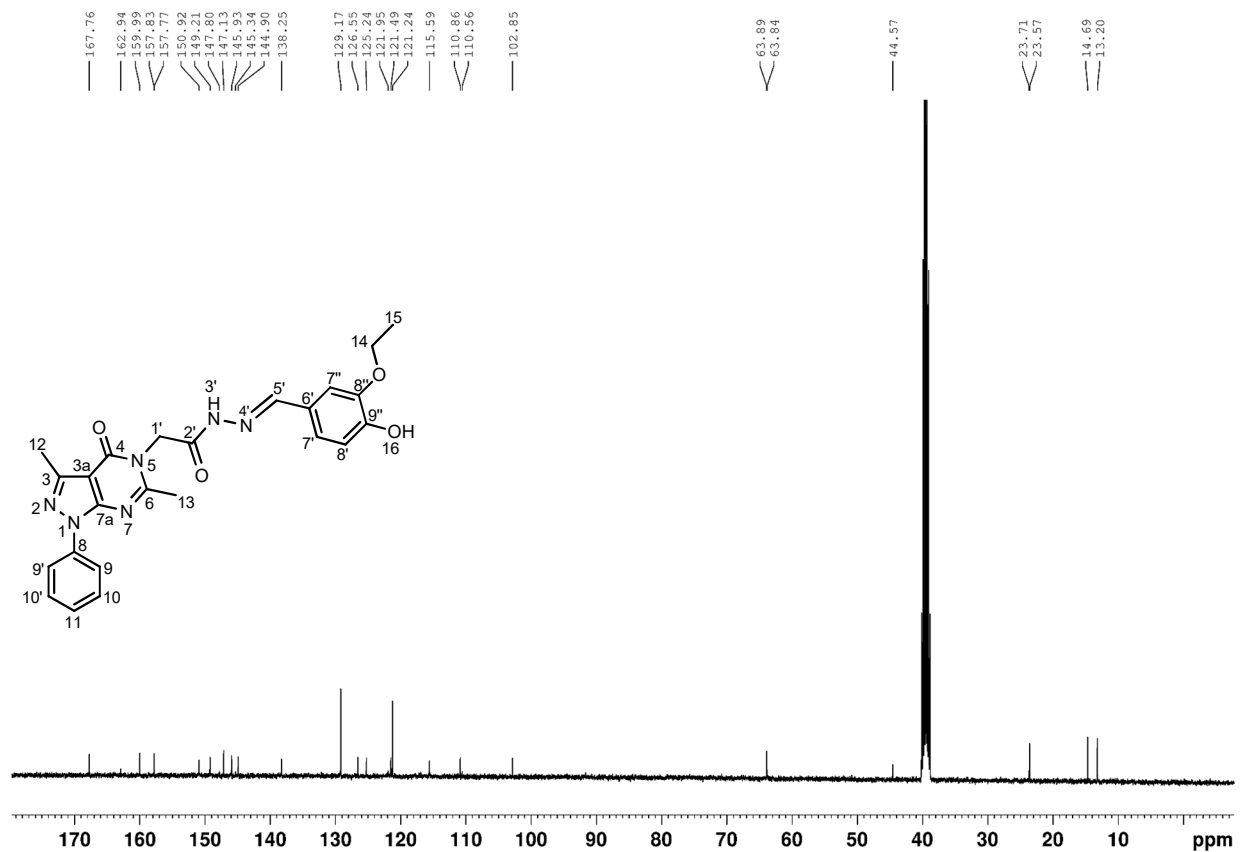

**Figure S19.**  $^{13}\text{C}$  NMR spectrum of compound 5e (DMSO- $d_6$ , 100MHz).

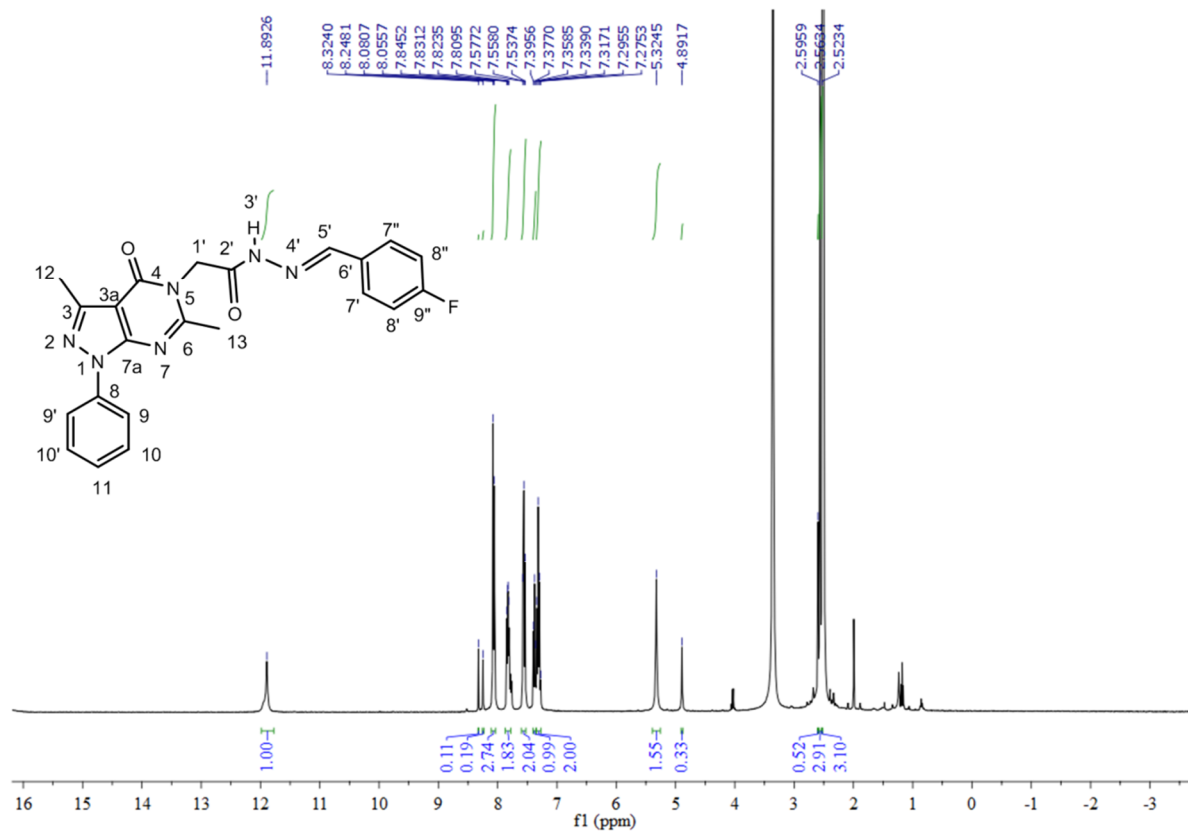

Figure S20. <sup>1</sup>H NMR spectrum of compound 5f (DMSO-*d*<sub>6</sub>, 400MHz).

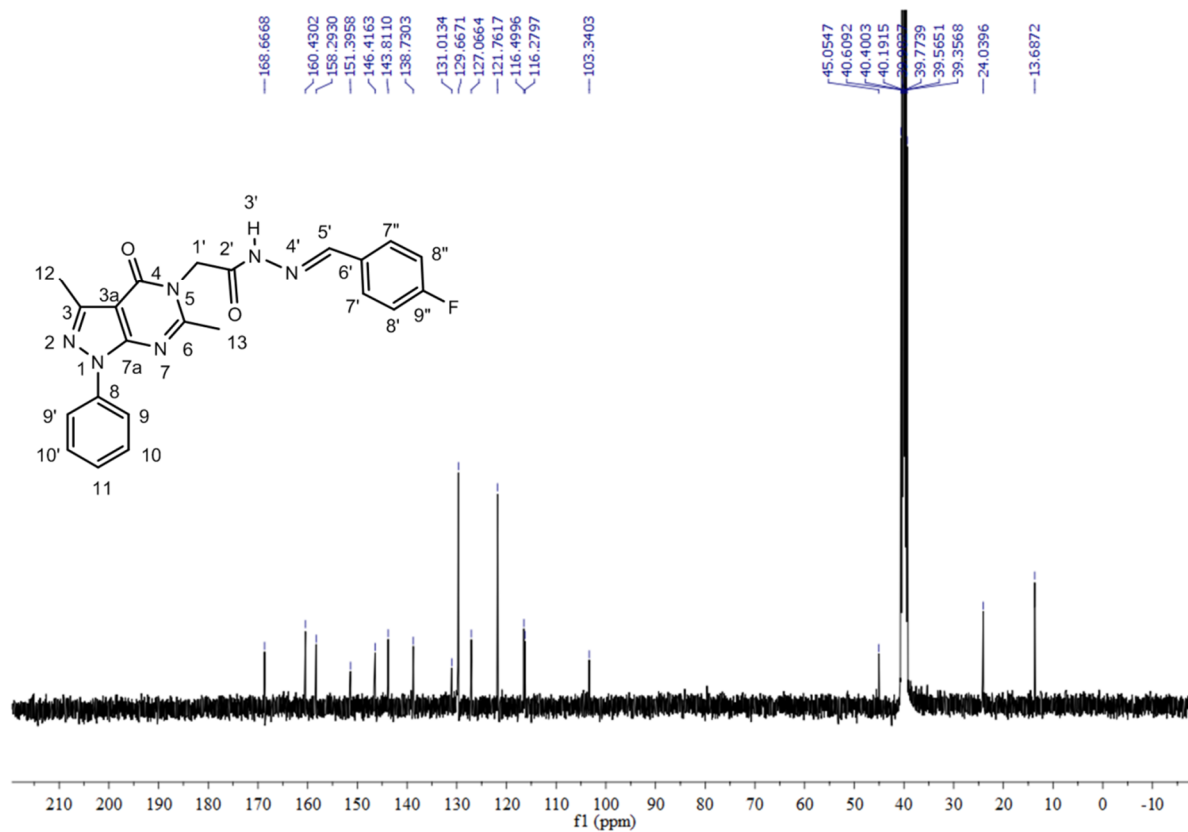

Figure S21. <sup>13</sup>C NMR spectrum of compound 5f (DMSO-*d*<sub>6</sub>, 100MHz).

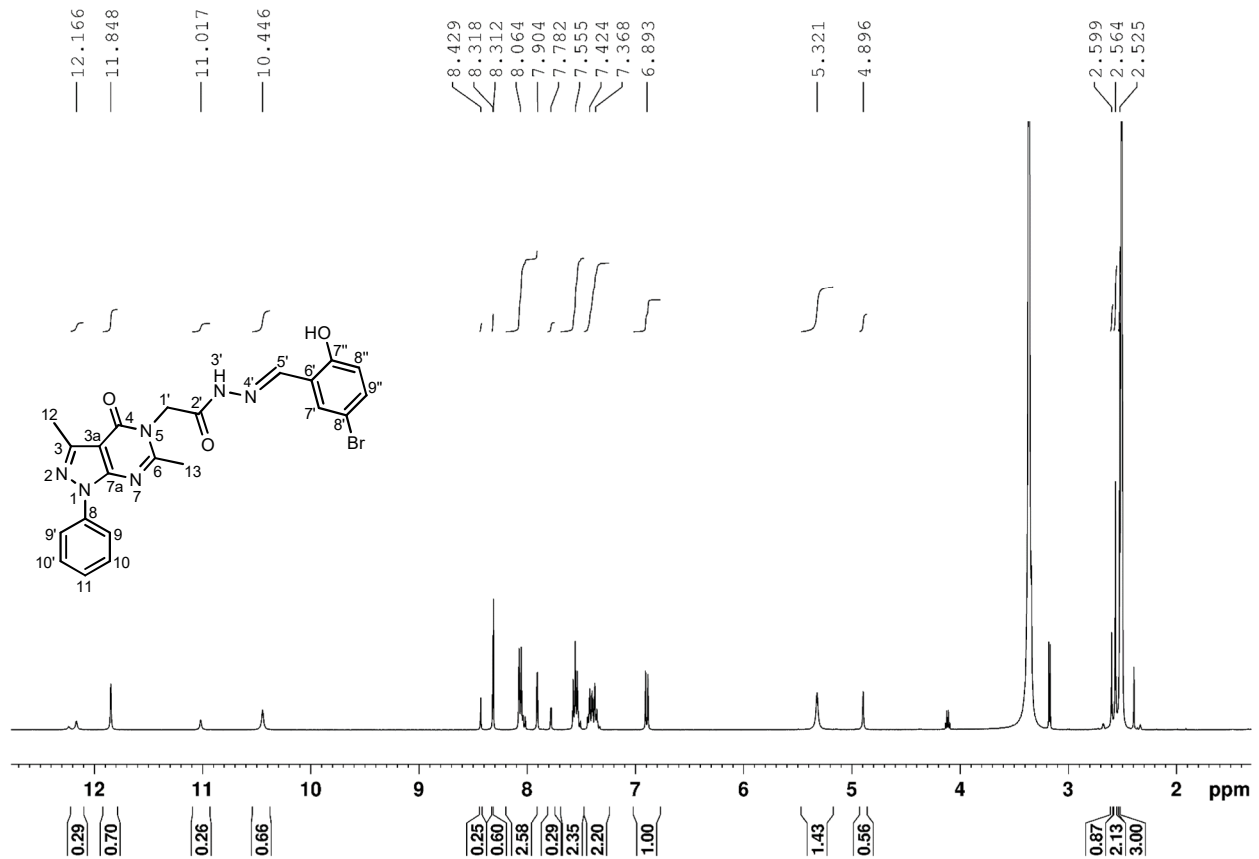

Figure S22. <sup>1</sup>H NMR spectrum of compound 5g (DMSO-*d*<sub>6</sub>, 400MHz)

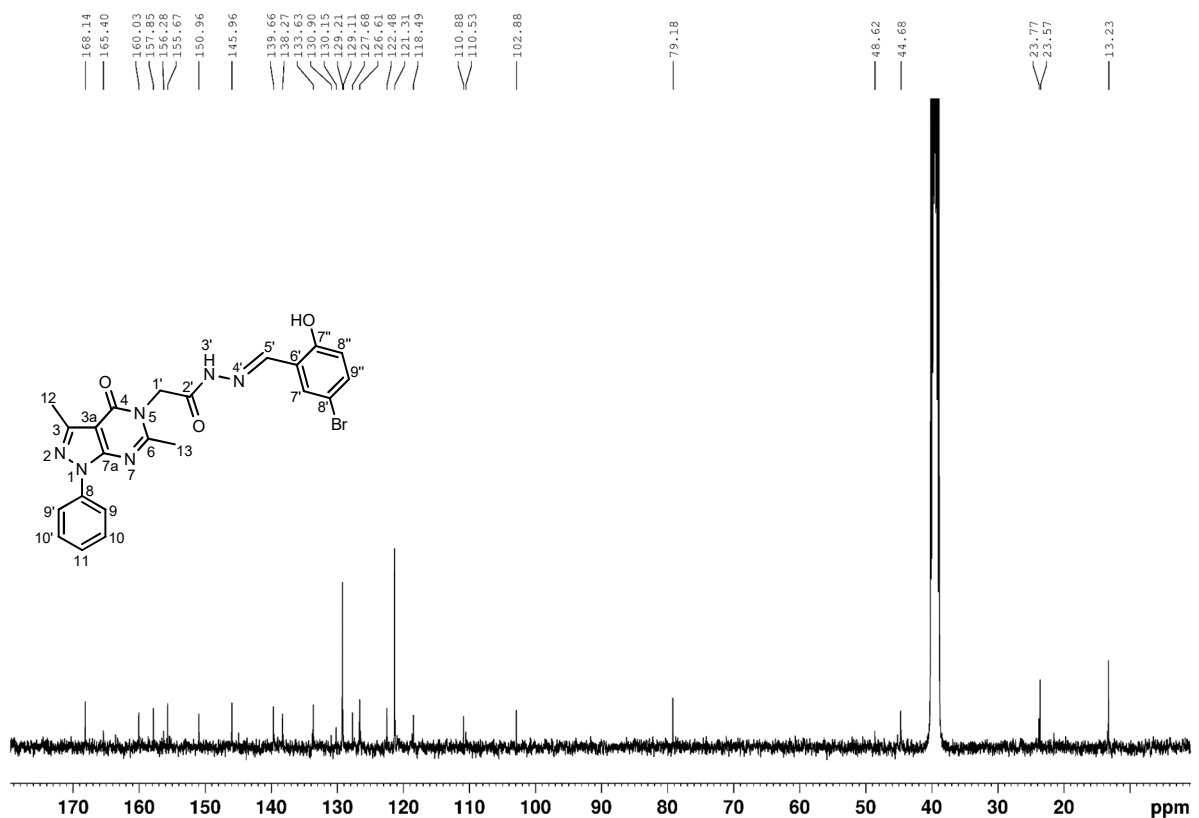

Figure S23. <sup>13</sup>C NMR spectrum of compound 5g (DMSO-*d*<sub>6</sub>, 100MHz)

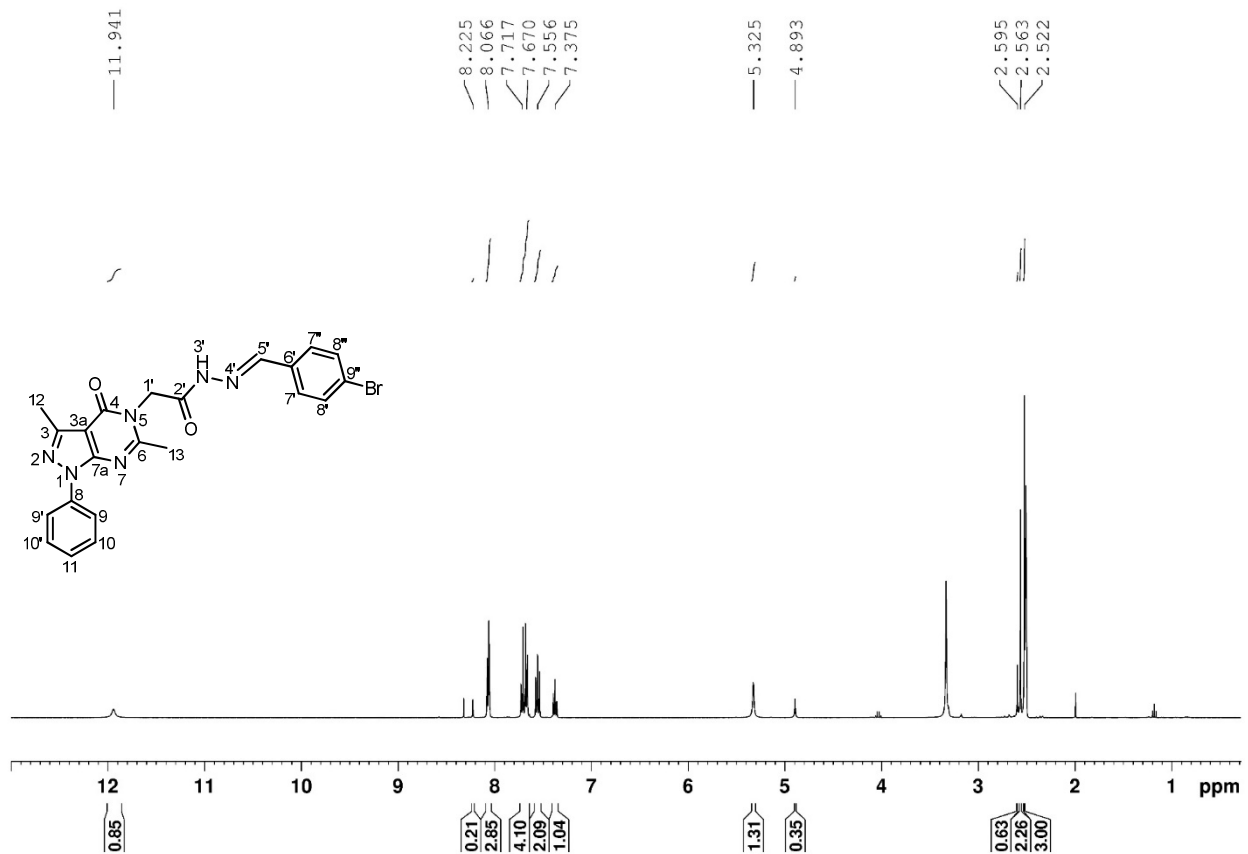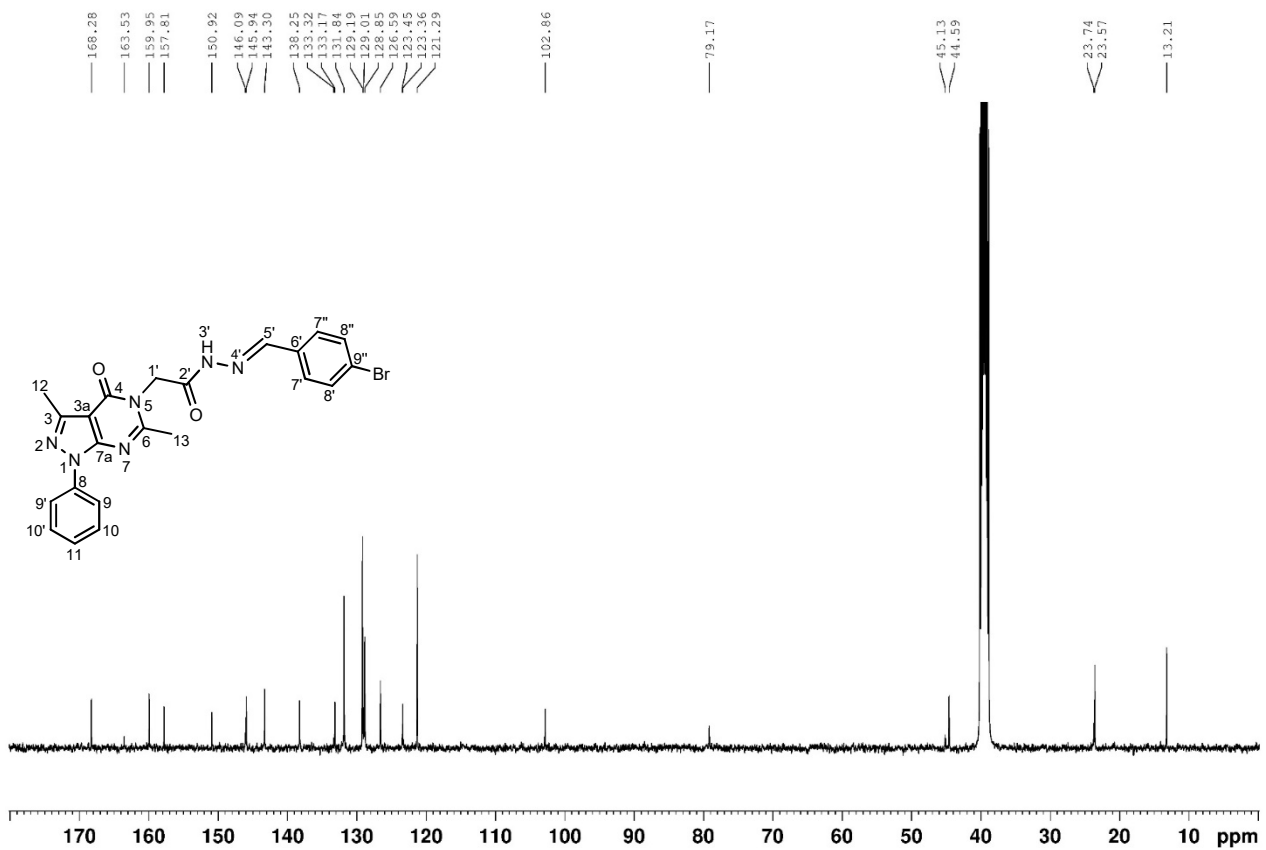

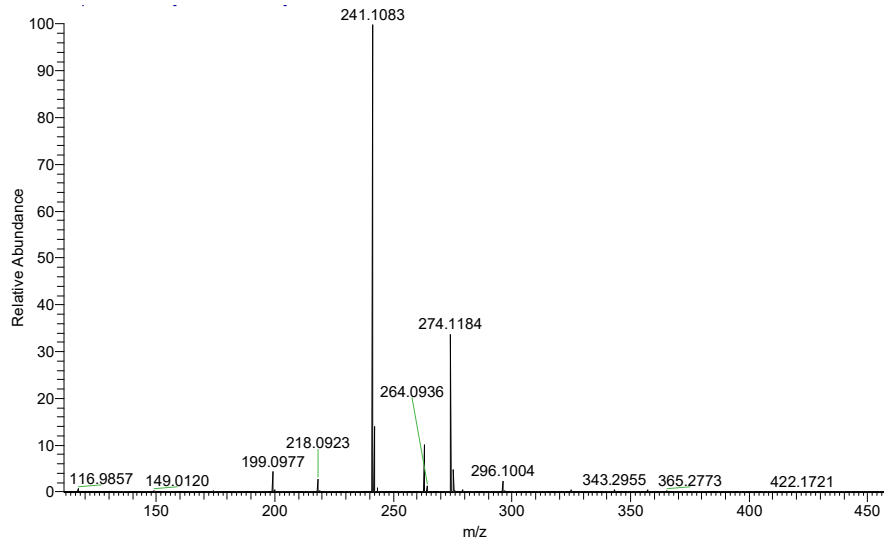

**Figure S26.** HR-ESI-MS spectrum of compound 2.

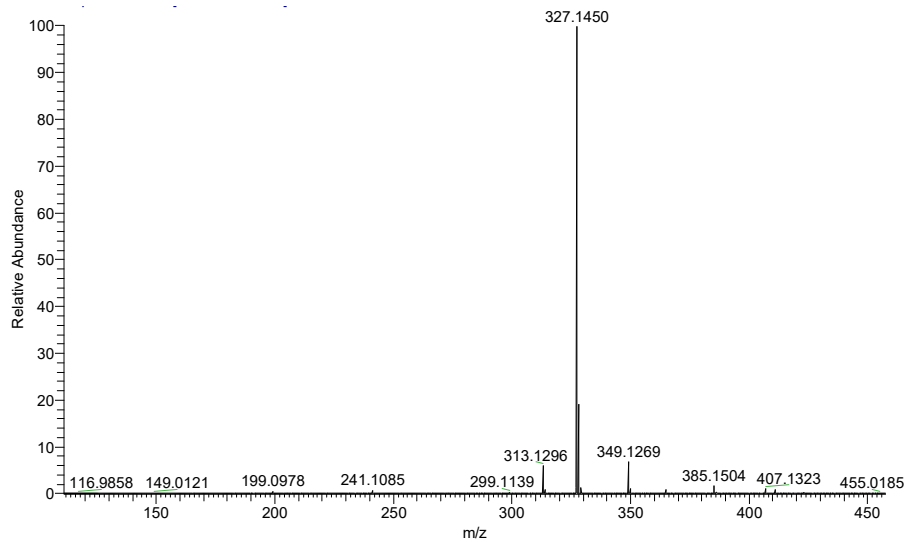

**Figure S27.** HR-ESI-MS spectrum of compound 3.

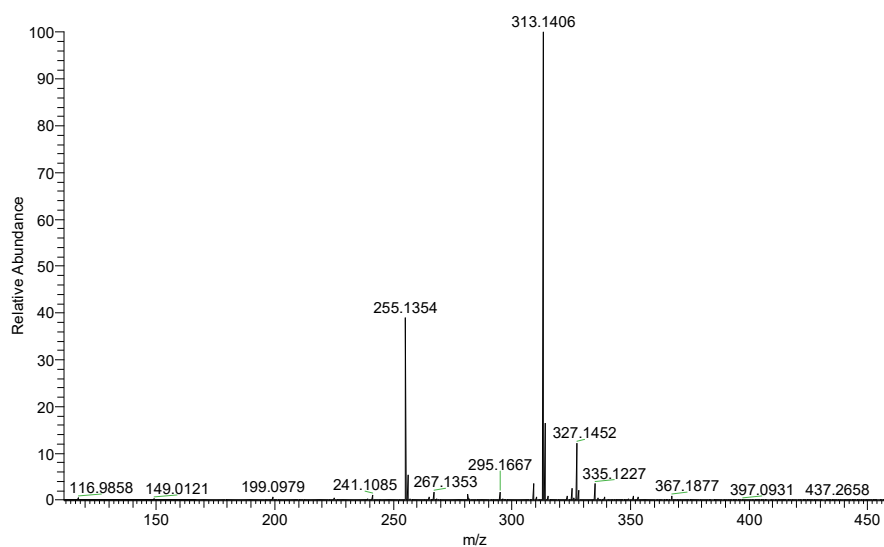

**Figure S28.** HR-ESI-MS spectrum of compound 4.

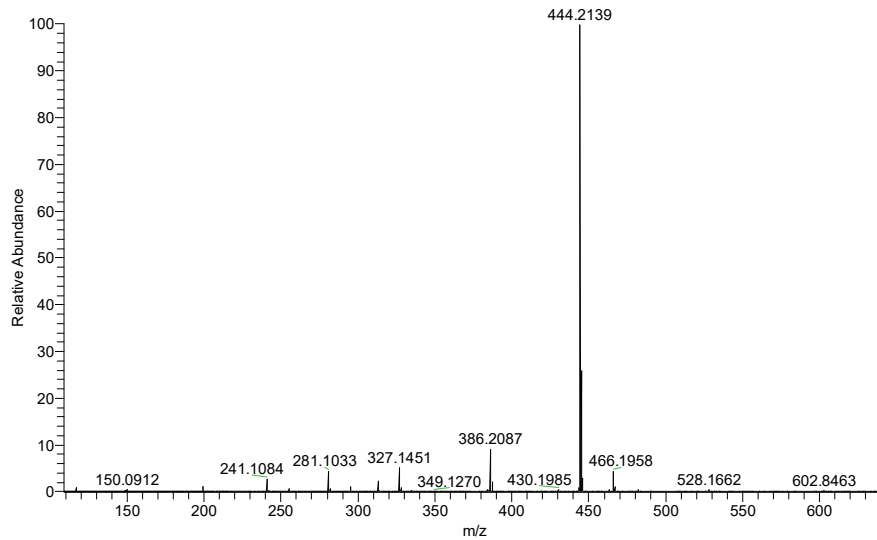

Figure S29. HR-ESI-MS spectrum of compound 5a.

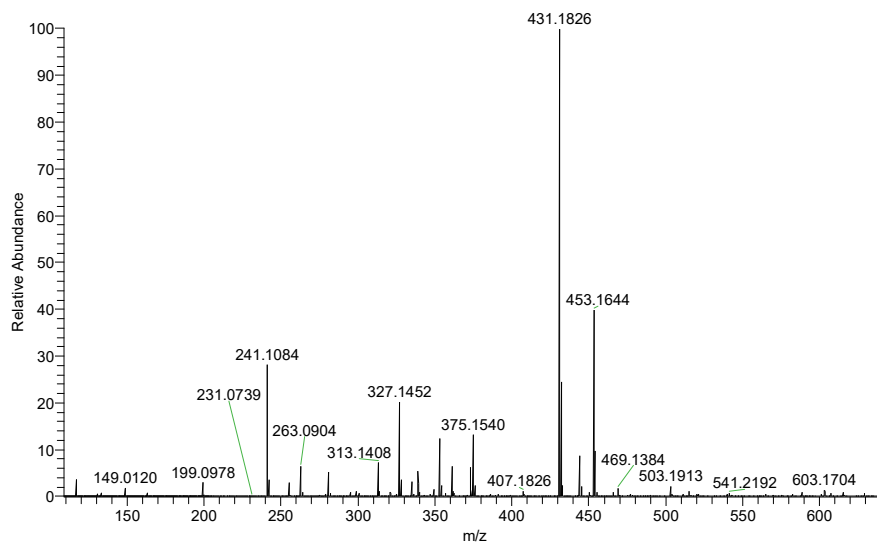

Figure S30. HR-ESI-MS spectrum of compound 5b.

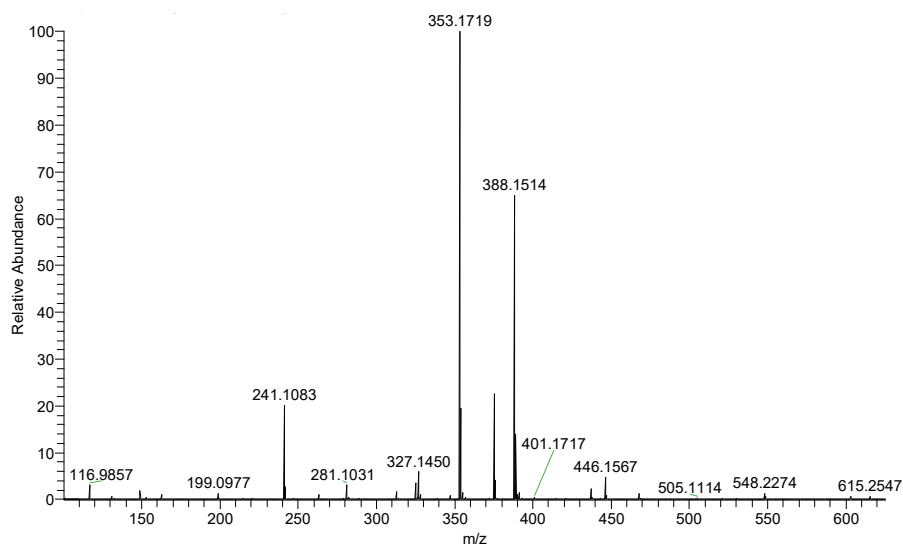

Figure S31. HR-ESI-MS spectrum of compound 5c.



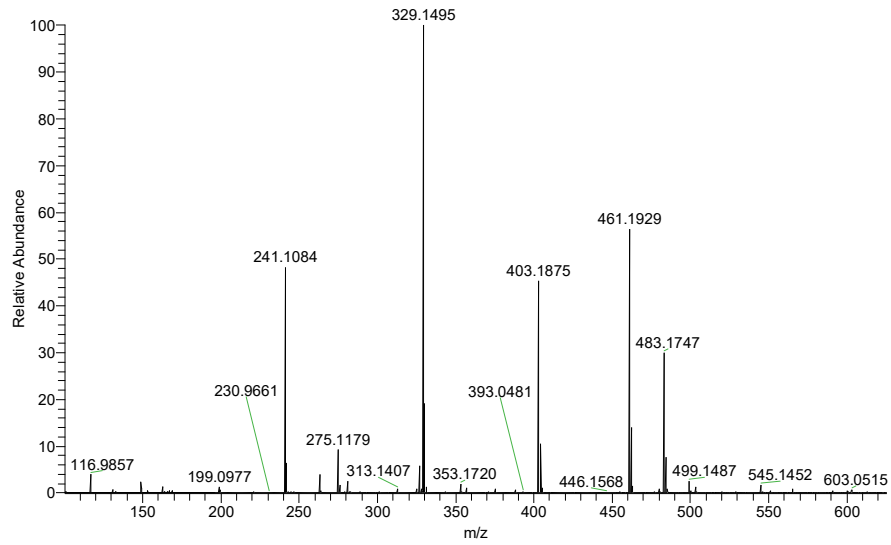

Figure S32. HR-ESI-MS spectrum of compound 5d.

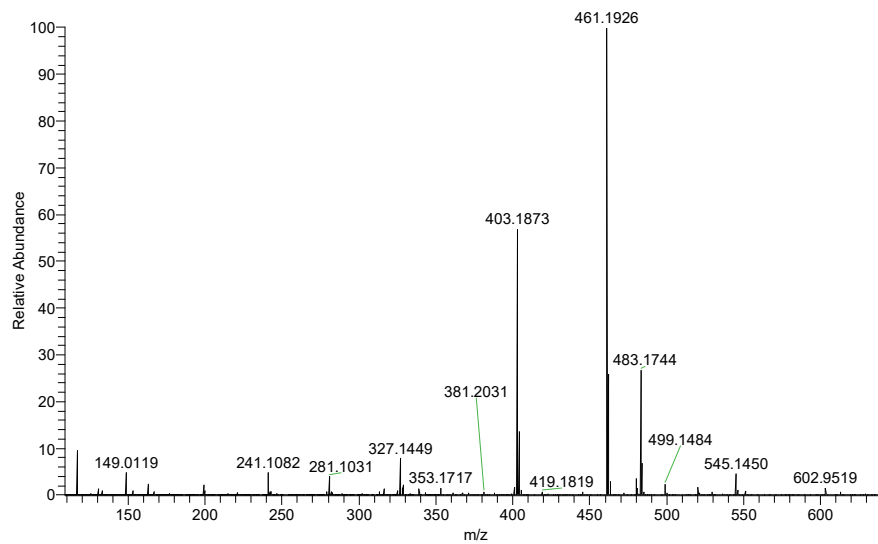

Figure S33. HR-ESI-MS spectrum of compound 5e.

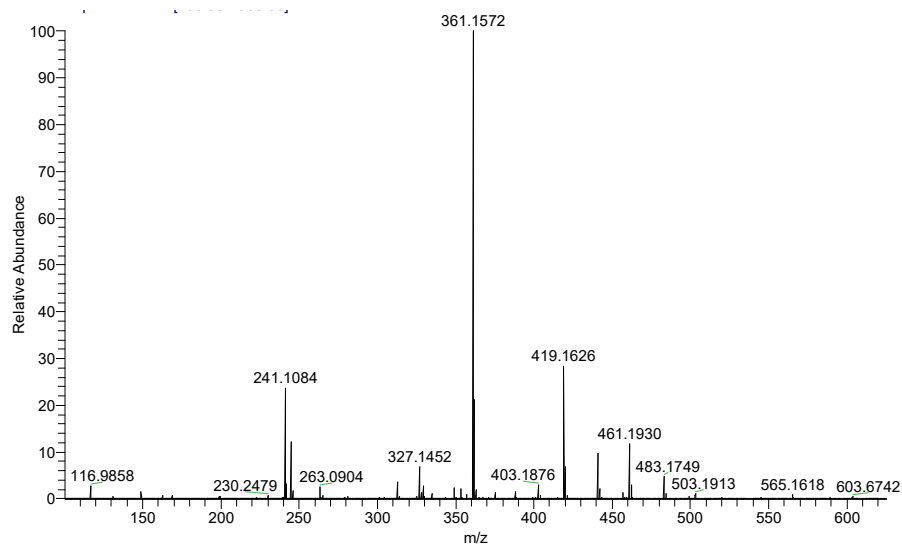

Figure S34. HR-ESI-MS spectrum of compound 5f.

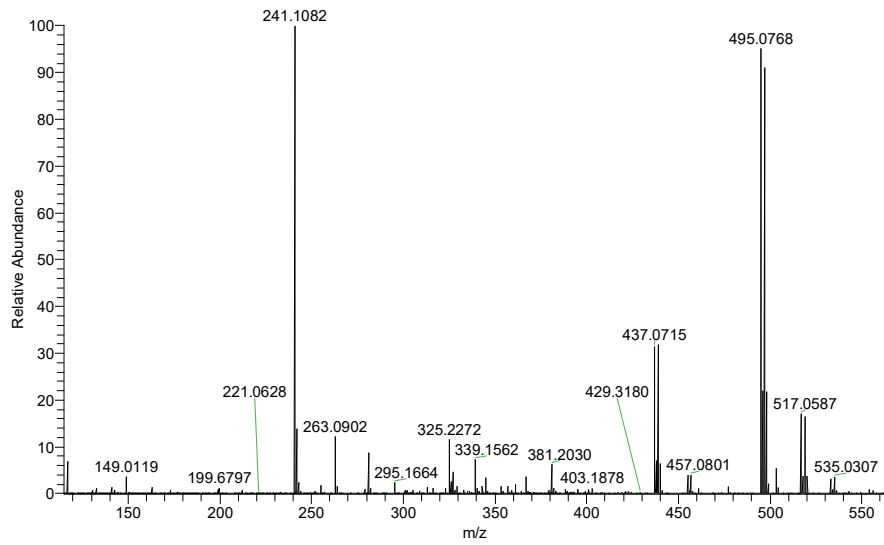

**Figure S35.** HR-ESI-MS spectrum of compound **5g**.

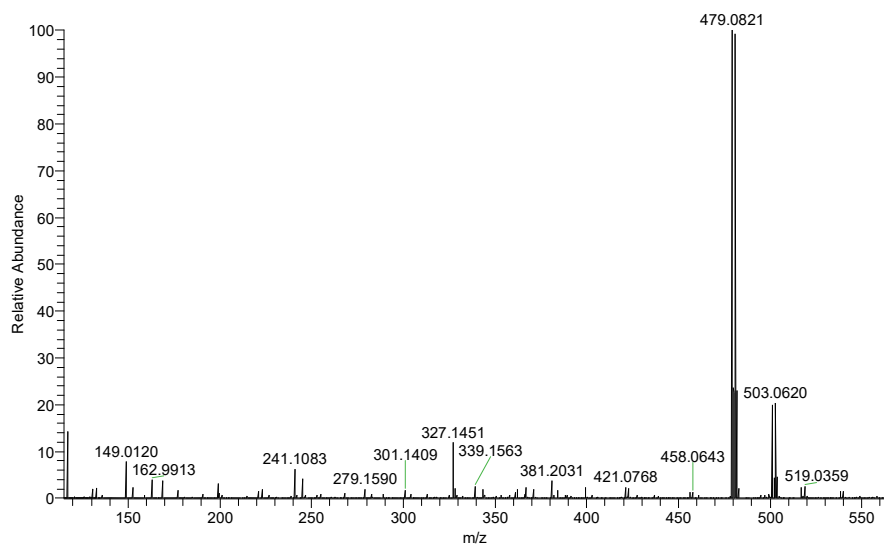

**Figure S36.** HR-ESI-MS spectrum of compound **5h**.
